# Supplementary material
Source: Springer Nature journal article supplement (https://www.springermedizin.de/resource/supplementary/12913_2008_833_MOESM2_ESM.pdf/9535680)
Supplement: MOESM2 [file 9535680]

## Formulas log transformation

Formula log transformation:

Log transformed data were used in the secondary analysis. For the logarithmic transformation of the primary data, we used the following formulas:

$$\sigma^2 = \ln(s^2/m^2 + 1); \mu = \ln(m/\sqrt{s^2/m^2 + 1});$$

where  $\mu$  and  $\sigma^2$  are the mean and variance on the log transformed scale, and  $m$  and  $s^2$  the mean and variance on the original scale respectively.
